# Supplementary material
Source: PubMed Central journal article supplement (PMC3343327)
Supplement: emboj201236s1.pdf [file emboj201236s1.pdf]

## McKnight et al Supplementary Materials

### Supplementary Figure Legends

**Supplementary Table S1. Top 1000 hits from the primary screen.** The 500 best increasers, and 500 best decreaseers from the primary screen are presented separately. The analysis was done as described in Methods. SCPO (spot count per object), STAPO (spot total area per object), STIPO (spot total intensity per object), OC (object count) for three replicates (r1-r3) are shown. Dharmacon catalogue numbers for the siGenome SMARTpools are also indicated.

**Supplementary Table S2. Autophagy genes identified in screen.** 17 known autophagy genes and isoforms were selected from the primary screen and shown here are the median Z-scores and corresponding ranks as decreaseers for SCPO, STIPO, STAPO, and rank products (RP).

**Supplementary Table S3. Deconvolution screen of 190 genes.** 760 siRNA duplexes were tested in triplicates and their median scores are expressed as percent of control as described in Methods. For each parameter (STIPO, SCPO, STAPO) scores above 1.2 are classified as positive, denoted as 1 in the positive column, scores below 0.8 are classified as negative, denoted as 1 in the negative column. Successful deconvolution is noted as 'yes' in 2 out of 4 duplexes column and is achieved when at least 2 out of 4 duplexes for any parameter repeat the primary screen and when the other 2 duplexes do not have the opposite effect in more than one parameter. 3 or 4 out of 4 duplexes is achieved when at least 3 out of 4 duplexes repeat the primary screen in any of the parameters. GAB1, previously suggested to be required for basal autophagy (Lipinski et al, 2010), is one such case where two duplexes had the opposite effect.

### **Supplementary Table S4. 51 validated-by-deconvolution hits.**

51 candidates are listed with official gene and protein annotations, and GO slim terms, cellular components and panther analysis. 51 hits were analysed for GO term annotations using the Generic GO term Mapper and generic GO slim terms (<http://go.princeton.edu/>), ([http://go.princeton.edu/GOTermMapper/goSlimFiles/goslim\\_generic.obo](http://go.princeton.edu/GOTermMapper/goSlimFiles/goslim_generic.obo)) and analysed using Panther annotation for protein class (<http://www.pantherdb.org>). The

p-values for GO terms were obtained using g:profiler (<http://biit.cs.ut.ee/gprofiler/>). Genes were also manually annotated using publically available data.

**Supplementary Figure S1. qRTPCR of 11 increasers.** qRTPCR was performed as described in Methods. Data shown is from a representative experiment; error bars represent standard deviation of triplicates. The number of times the experiment was performed is indicated.

- (A) ADHFE1 (n=2)
- (B) CNOT1 (n=2 duplex02 n=1 duplex04)
- (C) FBXL14 (n=1 duplex01 n=2 duplex04)
- (D) KIF25 (n=4 duplex01 n=3 duplex03)
- (E) RASGRF2 (n=3)
- (F) RASIP1 (n=3 duplex03 n=2 duplex04)
- (G) RBM12 (n=1 duplex03 n=2 duplex04)
- (H) SNX20 (n=1)
- (I) STAT2 (n=1 duplex01 n=2 duplex04)
- (J) TLK2 (n=4 duplex01 n=2 duplex03)
- (K) WDR6 (n=2)

**Supplementary Figure S2. qRTPCR of 9 decreaseers.** qRTPCR was performed as described in Methods. Data shown is from a representative experiment; error bars represent standard deviation of triplicates. The number of times the experiment was performed is indicated.

- (A) C1orf198 (n=1)
- (B) CDH19 (n=3)
- (C) GHSR (n=2)
- (D) LARP1 (n=1)
- (E) NAA25 (n=1)
- (F) PAFAH1B2 (n=1)
- (G) SCOC (n=4)
- (H) SUPT5H (n=1)
- (I) WAC (n=3)

**Supplementary Figure S3. Validation using LC3 lipidation in HeLa cells.**

(A)-(I), HeLa cells were treated with RISCfree or indicated siRNA duplexes, incubated in full medium (FM), starvation medium (ES), and ES with leupeptin (EL) for two hours. Note: candidate siRNA knock-downs were performed in duplicate. LC3 lipidation was analysed by anti-LC3 and anti-Actin western blotting, duplicates were quantified (see Methods), averaged and shown as LC3II/LC3I normalised to FM. When multiple experiments were performed (n=x) averaged values were averaged again from the multiple experiments. (A) KIF25 duplex-03 (n=3), bars represent the average of 3 experiments; (B) RASIP1 duplex-03 (n=2), bars represent the average of 2 experiments; (C) TLK2 duplex-03 (n=2), bars represent the average of 2 experiments; (D) WDR6 duplex-02 (n=2), bars represent the average of 2 experiments; (E) PAFAH1B2 duplex-04 (n=1), siPAFAH1B2 bars represent the average of duplicates; (F) LARP1 duplex-01 (n=1), siLARP1 bars represent the average of duplicates; (G) SCOC duplex-01 (n=4), bars represent the average of 4 experiments; error bars represent s.e.m, significance was determined using a two-tailed paired t-test: RF FM vs siSCOC-03 FM p=0.0238; RF EL vs siSCOC-03 EL p=0.0166; (H) SUPT5H duplex-01 (n=2), bars represent the average of 2 experiments; (I) WAC duplex-03 (n=3), bars represent the average of 3 experiments; error bars represent s.e.m, significance was determined using a two-tailed paired t-test: RF ES vs siWAC-03 ES p=0.0203.

**Supplementary Figure S4. Validated-by-deconvolution hits in autophagy interaction network (AIN). NRBF2 co-immunoprecipitates with SCOC. WAC co-immunoprecipitates with Beclin1.**

(A) List of 9 hits from our siGenome screen with the corresponding autophagy gene “Bait” to which the hit protein was found to bind during a proteomic analysis of the autophagy interaction network (Behrends et al, 2010). P-value, WD\_Score and Z-Score from the proteomics screen is indicated. \*\*denotes our siRNA screen hits that passed further validation (summarised in Fig. 2B). (B) Anti-Myc and -FLAG blots after indicated co-expression of FLAG-SCOC and Myc-NRBF2 in HEK293 cells and co-immunoprecipitation with anti-FLAG (left) or anti-Myc (right). Co-immunoprecipitation (IP), input lysate (Inp), unbound supernatant (Unb). (C) Anti-WAC and -GFP blots after indicated co-expression in HEK293 cells and indicated medium conditions. Co-immunoprecipitation of Myc-WAC plus GFP or plus GFP-Beclin with anti-GFP antibody.

**Supplementary Figure S5. Knock-down of SCOC inhibits p62 degradation.**

Western blots of p62 and actin from three separate experiments done as described in Figure 4B (siRNA depletion of SCOC, middle five lanes 6 – 10) and Figure 5A (siRNA depletion of FEZ1, last five lanes 11-15). Quantification is shown in Figure 4B and 5A for siSCOC and siFEZ1, respectively.

**Supplementary Figure S6. FEZ1 is a negative regulator of autophagy.**

**(A)** Knock-down of FEZ1 enhances autophagy. Anti-Actin and -LC3 blot after indicated siRNA in HEK293 cells. A representative blot is shown. Quantification of LC3II/actin from the average of two experiments with duplicate samples; values are normalised to RISCfree EL. qRT-PCR showing FEZ1 mRNA levels after indicated knock-down in GFP-LC3-HEK cells (error bars represent SD of triplicates). **(B)** Overexpression of FEZ1 inhibits autophagy. Anti-Actin, -LC3, and -GFP blot after transfection with pcDNA or FEZ1-GFP in HEK293 cells. A representative blot is shown. Quantification of LC3II/actin from the average of three experiments with duplicate samples; values are normalised to pcDNA EL; error bars represent s.e.m. (n=3); pcDNA EL vs FEZ1-GFP EL p=0.0444.

**Supplementary Figure S7. FEZ1 mutant that does not bind SCOC still binds to ULK1, and SCOC does not bind directly to ULK1.**

**(A)** MBP, MBP-FEZ1, either the wild-type (WT) or point mutations inhibiting binding to SCOC (L254P/L260P) were expressed in bacteria and purified. In vitro translated <sup>35</sup>S-Myc-ULK1 was added and the MBP-tagged proteins were immobilized and the bound ULK1 was detected by autoradiography (top). The input MBP, and MBP-FEZ1 proteins were detected by coomassie blue staining (CB) bottom panel. 10% input is derived from <sup>35</sup>S-Myc-ULK reaction mix. **(B)** SCOC does not bind to ULK1. In vitro translated <sup>35</sup>S-myc-ULK1 failed to bind to GST-SCOC in pull-down assays.

**References**

Behrends C, Sowa ME, Gygi SP, Harper JW (2010) Network organization of the human autophagy system. *Nature* **466**: 68-76

Lipinski MM, Hoffman G, Ng A, Zhou W, Py BF, Hsu E, Liu X, Eisenberg J, Liu J, Blenis J, Xavier RJ, Yuan J (2010) A Genome-Wide siRNA Screen Reveals Multiple mTORC1 Independent Signaling Pathways Regulating Autophagy under Normal Nutritional Conditions. *Dev Cell* **18**: 1041-1052

| Accession no | Gene ID | Gene Symbol         | Dharmacon name | Dharmacon cat no | Median SCPO | Rank by SCPO | Median STIPO | Rank by STIPO | Median STAPO | Rank by STAPO | Rank product (RP) as decreaseers |
|--------------|---------|---------------------|----------------|------------------|-------------|--------------|--------------|---------------|--------------|---------------|----------------------------------|
| NM_032852    | 84938   | <b>ATG4C</b>        | APG4C          | M-005788-00      | -2.199      | 115          | -2.073       | 73            | -2.451       | 32            | 64.5                             |
| NM_003565    | 8408    | <b>ULK1</b>         | ULK1           | M-005049-00      | -2.012      | 192          | -2.207       | 40            | -1.969       | 164           | 108.0                            |
| XM_375080    | 22863   | <b>ATG14/Barkor</b> | KIAA0831       | M-020438-00      | -1.558      | 666          | -1.686       | 295           | -1.051       | 1906          | 720.8                            |
| NM_024085    | 79065   | <b>ATG9A</b>        | FLJ22169       | M-014294-00      | -1.536      | 699          | -1.401       | 731           | -1.38        | 883           | 767.0                            |
| NM_014781    | 9821    | <b>FIP200</b>       | RB1CC1         | M-021117-00      | -1.538      | 695          | -1.225       | 1209          | -1.573       | 562           | 778.7                            |
| NM_006395    | 10533   | <b>ATG7</b>         | APG7L          | M-020112-00      | -1.006      | 2218         | -1.026       | 1850          | -0.992       | 2129          | 2059.5                           |
| NM_022818    | 81631   | <b>MAP1LC3B</b>     | MAP1LC3B       | M-012846-00      | -0.884      | 2881         | -1.328       | 886           | -0.674       | 4041          | 2176.8                           |
| NM_022488    | 64422   | <b>ATG3</b>         | APG3           | M-015375-00      | -0.73       | 3707         | -0.954       | 2246          | -1.204       | 1365          | 2248.3                           |
| NM_004707    | 9140    | <b>ATG12</b>        | APG12L         | M-010212-01      | -0.765      | 3494         | -0.697       | 3739          | -0.845       | 2876          | 3349.3                           |
| NM_003766    | 8678    | <b>BECN1</b>        | BECN1          | M-010552-00      | -0.506      | 5370         | -0.593       | 4694          | -0.634       | 4403          | 4805.7                           |
| NM_014683    | 9706    | <b>ULK2</b>         | ULK2           | M-005396-01      | -0.355      | 6601         | -0.375       | 6297          | -0.287       | 7065          | 6646.9                           |
| NM_014741    | 9776    | <b>ATG13</b>        | KIAA0652       | M-020765-00      | 0.253       | 12362        | -0.219       | 7715          | -0.361       | 6466          | 8511.8                           |
| NM_013325    | 23192   | <b>ATG4B</b>        | APG4B          | M-005786-00      | -0.131      | 8581         | -0.063       | 9215          | -0.09        | 8998          | 8927.4                           |
| NM_052936    | 115201  | <b>ATG4A</b>        | APG4A          | M-005789-00      | 0.004       | 9965         | -0.011       | 9703          | 0.038        | 10548         | 10065.9                          |
| XM_290517    | 23130   | <b>ATG2A</b>        | KIAA0404       | M-026591-00      | -0.037      | 9416         | 0.024        | 10158         | 0.0865       | 10912         | 10143.6                          |
| NM_173681    | 285973  | <b>ATG9B</b>        | NOS3AS         | M-018082-00      | 0.152       | 11510        | -0.009       | 9668          | 0.303        | 12988         | 11306.2                          |
| NM_015610    | 26100   | <b>WIPI2</b>        | DKFZP434J154   | M-020521-00      | 0.27        | 12546        | 0.03         | 10322         | 0.282        | 12713         | 11807.9                          |
| NM_004849    | 9474    | <b>ATG5</b>         | APG5L          | M-004374-02      | 0.415       | 13888        | 0.293        | 12610         | 0.266        | 12656         | 13038.2                          |
| NM_017974    | 55054   | <b>ATG16L1</b>      | APG16L         | M-021033-00      | 0.486       | 14485        | 0.633        | 15301         | 0.122        | 11281         | 13572.6                          |
| NM_031482    | 83734   | <b>ATG10</b>        | APG10L         | M-019426-00      | 1.347       | 19048        | 2.111        | 19814         | 1.364        | 19034         | 19295.3                          |

McKnight Supplementary Table S2



McKnight Supplementary Figure S1



McKnight Supplementary Figure S2



McKnight Supplementary Figure S3





McKnight Supplementary Figure S5



McKnight Supplementary Figure S6



McKnight Supplementary Figure S7
